# Supplementary material for: Distribution and genomic characterization of tigecycline-resistant tet(X4)-positive Escherichia coli of swine farm origin
Source: PubMed Central journal article supplement (PMC8627205; doi:10.1099/mgen.0.000667), 2021-10-25
Supplement: mgen-7-0667-s001.pdf [file mgen-7-0667-s001.pdf]

## Supplementary Data

**Supplementary Table 1. Numbers of *tet(X4)* positive strains and their prevalence among different sources in the swine farm.**

| Source    | Number of samples | Number of <i>tet(X4)</i> positive samples | Positive rate <sup>a</sup> | Number of <i>tet(X4)</i> positive strains | Number of conjugative strains | Conjugative transfer rate <sup>b</sup> |
|-----------|-------------------|-------------------------------------------|----------------------------|-------------------------------------------|-------------------------------|----------------------------------------|
| All       | 159               | 29                                        | 18.24%                     | 32                                        | 16                            | 50%                                    |
| Faeces    | 36                | 9                                         | 25%                        | 9                                         | 4                             | 44.44%                                 |
| Anal swab | 36                | 11                                        | 30.56%                     | 13                                        | 3                             | 23.08%                                 |
| Nose swab | 36                | 5                                         | 13.89%                     | 5                                         | 5                             | 100%                                   |
| Soil      | 21                | 2                                         | 9.52%                      | 2                                         | 1                             | 50%                                    |
| Water     | 30                | 2                                         | 6.67%                      | 3                                         | 3                             | 100%                                   |

<sup>a</sup> Positive rate = Number of *tet(X4)* positive samples/Number of samples.

<sup>b</sup> Conjugative transfer rate = Number of conjugable strains/Number of *tet(X4)* positive strains.

**Supplementary Table 2. Basic information of the three samples detected with two *tet(X)* positive strains.**

| Sample IDs | Source    | Strain IDs | ST-type | Resistance genes                                                                                                                                                                                                                                                                                | Replicons                                                      |
|------------|-----------|------------|---------|-------------------------------------------------------------------------------------------------------------------------------------------------------------------------------------------------------------------------------------------------------------------------------------------------|----------------------------------------------------------------|
| NTW25      | water     | NT1W25     | ST641   | <i>aph(3'')-Ib</i> , <i>aph(6)-Id</i> , <i>bla<sub>EC-13</sub></i> ,<br><i>bla<sub>TEM-150</sub></i> , <i>dfrA5</i> , <i>ermB</i> , <i>floR</i> , <i>mef(B)</i> ,<br><i>qnrS1</i> , <i>sul2</i> , <i>sul3</i> , <i>tet(A)</i> , <i>tet(M)</i> , <i>tet(X4)</i>                                  | IncFIA(HI1), IncFIB(K), IncFII,<br>IncX1                       |
|            |           | NT2W25     | ST10    | <i>mph(A)</i> , <i>bla<sub>EC</sub></i> , <i>bla<sub>TEM-1B</sub></i> , <i>dfrA5</i> ,<br><i>erm(B)</i> , <i>floR</i> , <i>mef(B)</i> , <i>qnrS1</i> , <i>sul3</i> ,<br><i>tet(A)</i> , <i>tet(M)</i> , <i>tet(X4)</i>                                                                          | IncFIA(HI1), IncFIB(K),<br>IncFII(pHN7A8), IncX1               |
| NTA7       | anal swab | NT1A7      | ST761   | <i>bla<sub>EC-15</sub></i> , <i>bla<sub>TEM-1B</sub></i> , <i>dfrA5</i> , <i>floR</i> , <i>mef(B)</i> ,<br><i>qnrS1</i> , <i>sul3</i> , <i>tet(A)</i> , <i>tet(M)</i> , <i>tet(X4)</i>                                                                                                          | IncFIA(HI1), IncFIB(K),<br>IncFII(pCoo), IncX1, IncY           |
|            |           | NT2A7      | ST218   | <i>aph(3'')-Ib</i> , <i>aph(6)-Id</i> , <i>bla<sub>EC-15</sub></i> ,<br><i>bla<sub>TEM-1B</sub></i> , <i>dfrA5</i> , <i>floR</i> , <i>mef(B)</i> , <i>qnrS1</i> ,<br><i>sul3</i> , <i>tet(A)</i> , <i>tet(M)</i> , <i>tet(X4)</i>                                                               | IncFIA(HI1), IncFIB(K), IncFII,<br>IncX1                       |
| NTA19      | anal swab | NT1A19     | ST716   | <i>aadA5</i> , <i>aph(3'')-Ib</i> , <i>aph(6)-Id</i> , <i>bla<sub>EC</sub></i> ,<br><i>bla<sub>TEM-1B</sub></i> , <i>dfrA17</i> , <i>dfrA5</i> , <i>erm(B)</i> , <i>floR</i> ,<br><i>mef(B)</i> , <i>mph(A)</i> , <i>sul1</i> , <i>sul3</i> , <i>tet(A)</i> ,<br><i>tet(M)</i> , <i>tet(X4)</i> | IncFIA(HI1), IncFIB(K),<br>IncFIB(pHCM2), IncR, IncX1,<br>IncY |
|            |           | NT2A19     | ST716   | <i>aadA5</i> , <i>aph(3'')-Ib</i> , <i>aph(6)-Id</i> , <i>bla<sub>EC</sub></i> ,<br><i>bla<sub>TEM-1B</sub></i> , <i>dfrA17</i> , <i>dfrA5</i> , <i>erm(B)</i> , <i>floR</i> ,<br><i>mef(B)</i> , <i>mph(A)</i> , <i>sul1</i> , <i>sul3</i> , <i>tet(A)</i> ,<br><i>tet(M)</i> , <i>tet(X4)</i> | IncFIA(HI1), IncFIB(K),<br>IncFIB(pHCM2), IncR, IncX1,<br>IncY |

**Supplementary Table 3. Antimicrobial susceptibility profiles of the *tet(X4)*-positive strains and corresponding transconjugants to different antimicrobials (mg/L).**

| Isolates | Source         | <i>tet(X)</i> genetic contexts | Antimicrobials <sup>a</sup> |     |     |     |        |       |     |       |      |     |        |     |     |      |       |
|----------|----------------|--------------------------------|-----------------------------|-----|-----|-----|--------|-------|-----|-------|------|-----|--------|-----|-----|------|-------|
|          |                |                                | TIG                         | TET | FFC | DOX | ATM    | CQM   | KAN | ENR   | AMX  | OXY | CL     | TMP | STR | MIN  | MEM   |
| NT2W25   | Water          | III                            | 64                          | >64 | >64 | 64  | ≤0.125 | ≤0.25 | 8   | >16   | >128 | >64 | ≤0.125 | >64 | 16  | >128 | ≤0.03 |
| NTJ2W25  | transconjugant | III                            | 16                          | >64 | >64 | 32  | ≤0.125 | ≤0.25 | 2   | ≤0.03 | 16   | >64 | ≤0.125 | >64 | 8   | 64   | ≤0.03 |
| NT1N31   | Nose swab      | I-2                            | 64                          | >64 | >64 | 128 | ≤0.125 | ≤0.25 | 16  | 2     | >128 | >64 | ≤0.125 | >64 | 16  | >128 | ≤0.03 |
| NTC1N31  | transconjugant | I-2                            | 64                          | >64 | >64 | 64  | ≤0.125 | ≤0.25 | 4   | 2     | >128 | >64 | ≤0.125 | >64 | 8   | >128 | ≤0.03 |
| NT1N4    | Nose swab      | II-2                           | 64                          | >64 | >64 | 64  | ≤0.125 | ≤0.25 | 16  | 1     | >128 | >64 | ≤0.125 | >64 | 16  | >128 | ≤0.03 |
| NTC1N4   | transconjugant | II-2                           | 32                          | >64 | >64 | 64  | ≤0.125 | ≤0.25 | 4   | 1     | >128 | >64 | ≤0.125 | >64 | 4   | >128 | ≤0.03 |
| NT1A25   | Anal swab      | III                            | 32                          | >64 | >64 | 64  | ≤0.125 | ≤0.25 | 8   | 2     | >128 | >64 | ≤0.125 | >64 | 64  | >128 | ≤0.03 |
| NTC1A25  | transconjugant | III                            | 4                           | >64 | >64 | 32  | ≤0.125 | ≤0.25 | 4   | 0.5   | >128 | >64 | ≤0.125 | 64  | 64  | >128 | ≤0.03 |
| NT1A31   | Anal swab      | III                            | 32                          | >64 | >64 | 64  | 0.25   | ≤0.25 | 8   | 0.5   | >128 | >64 | ≤0.125 | >64 | 8   | >128 | ≤0.03 |
| NTC1A31  | transconjugant | III                            | 32                          | >64 | >64 | 128 | ≤0.125 | ≤0.25 | 4   | 4     | >128 | >64 | ≤0.125 | >64 | 8   | 128  | ≤0.03 |
| NT1W22   | Water          | III                            | 8                           | >64 | >64 | 64  | ≤0.125 | ≤0.25 | 8   | 1     | >128 | >64 | ≤0.125 | >64 | 16  | >128 | ≤0.03 |
| NTC1W22  | transconjugant | III                            | 16                          | >64 | >64 | 64  | ≤0.125 | ≤0.25 | 4   | 16    | >128 | >64 | ≤0.125 | >64 | 8   | >128 | ≤0.03 |
| NT1W25   | Water          | III                            | 64                          | >64 | >64 | 64  | 0.25   | ≤0.25 | 16  | >16   | >128 | >64 | ≤0.125 | >64 | 64  | >128 | ≤0.03 |
| NTC1W25  | transconjugant | III                            | 32                          | >64 | >64 | 64  | ≤0.125 | ≤0.25 | 4   | 4     | >128 | >64 | ≤0.125 | >64 | 128 | >128 | ≤0.03 |
| NT1C1    | Soil           | II-1                           | 32                          | >64 | >64 | 64  | ≤0.125 | ≤0.25 | 8   | 0.25  | >128 | >64 | ≤0.125 | >64 | 8   | >128 | ≤0.03 |
| NTJ1C1   | transconjugant | II-1                           | 16                          | >64 | >64 | 64  | ≤0.125 | ≤0.25 | 8   | ≤0.03 | 16   | >64 | ≤0.125 | >64 | 8   | >128 | ≤0.03 |
| NT1F25   | Faeces         | III                            | 4                           | >64 | >64 | 64  | ≤0.125 | ≤0.25 | 8   | 2     | >128 | >64 | ≤0.125 | >64 | 32  | >128 | ≤0.03 |
| NTJ1F25  | transconjugant | III                            | 32                          | >64 | >64 | 32  | ≤0.125 | ≤0.25 | 8   | 2     | >128 | >64 | ≤0.125 | 64  | 4   | 128  | ≤0.03 |
| NT1N25   | Nose swab      | III                            | 32                          | >64 | >64 | 64  | 64     | >128  | 16  | >16   | >128 | >64 | ≤0.125 | >64 | 8   | >128 | ≤0.03 |
| NTJ1N25  | transconjugant | III                            | 16                          | >64 | >64 | 64  | 32     | >128  | 4   | 1     | >128 | >64 | ≤0.125 | >64 | 8   | 64   | ≤0.03 |
| NT1N34   | Nose swab      | I-2                            | 128                         | >64 | >64 | 64  | ≤0.125 | ≤0.25 | 16  | 2     | >128 | >64 | ≤0.125 | >64 | 16  | >128 | ≤0.03 |
| NTJ1N34  | transconjugant | I-2                            | 64                          | >64 | >64 | 64  | ≤0.125 | ≤0.25 | 8   | 2     | >128 | >64 | ≤0.125 | >64 | 8   | >128 | ≤0.03 |
| NT1F31   | Faeces         | III                            | 32                          | >64 | >64 | 64  | ≤0.125 | ≤0.25 | 8   | 8     | >128 | >64 | ≤0.125 | >64 | 8   | >128 | ≤0.03 |
| NTC1F31  | transconjugant | III                            | 32                          | >64 | >64 | 32  | ≤0.125 | ≤0.25 | 4   | 4     | >128 | >64 | ≤0.125 | >64 | 8   | >128 | ≤0.03 |
| NT1F34   | Faeces         | III                            | 32                          | >64 | >64 | 128 | ≤0.125 | ≤0.25 | 8   | 0.5   | >128 | >64 | ≤0.125 | >64 | 8   | >128 | ≤0.03 |
| NTC1F34  | transconjugant | III                            | 16                          | >64 | 8   | 32  | ≤0.125 | ≤0.25 | 2   | 4     | >128 | >64 | ≤0.125 | >64 | 4   | 64   | ≤0.03 |
| NT1N28   | Nose swab      | III                            | 64                          | >64 | >64 | 128 | ≤0.125 | ≤0.25 | 16  | 0.5   | >128 | >64 | ≤0.125 | >64 | 16  | >128 | ≤0.03 |
| NTJ1N28  | transconjugant | III                            | 32                          | >64 | >64 | 64  | ≤0.125 | ≤0.25 | 4   | 4     | >128 | >64 | ≤0.125 | >64 | 4   | >128 | ≤0.03 |

|         |                |      |    |     |     |     |        |       |   |       |      |     |        |     |     |      |       |
|---------|----------------|------|----|-----|-----|-----|--------|-------|---|-------|------|-----|--------|-----|-----|------|-------|
| NT1F10  | Faeces         | II-2 | 32 | >64 | >64 | 128 | ≤0.125 | ≤0.25 | 8 | 0.5   | >128 | >64 | ≤0.125 | >64 | 16  | >128 | ≤0.03 |
| NTJ1F10 | transconjugant | II-2 | 32 | >64 | >64 | 64  | ≤0.125 | ≤0.25 | 4 | 1     | 16   | >64 | ≤0.125 | >64 | 8   | >128 | ≤0.03 |
| NT2A7   | Anal swab      | III  | 16 | >64 | >64 | 64  | ≤0.125 | ≤0.25 | 8 | 2     | >128 | >64 | ≤0.125 | >64 | 128 | >128 | ≤0.03 |
| NTJ2A7  | transconjugant | III  | 2  | >64 | >64 | 32  | ≤0.125 | ≤0.25 | 2 | ≤0.03 | 32   | >64 | ≤0.125 | 64  | 4   | 8    | ≤0.03 |
| NT1C4   | Soil           | III  | 64 | >64 | >64 | 64  | ≤0.125 | ≤0.25 | 2 | <0.03 | >128 | >64 | <0.125 | >64 | 64  | 128  | ≤0.03 |
| NT1A13  | Anal swab      | III  | 32 | >64 | >64 | 64  | ≤0.125 | ≤0.25 | 4 | 0.125 | >128 | >64 | <0.125 | >64 | 4   | 64   | ≤0.03 |
| NT1A16  | Anal swab      | III  | 64 | >64 | >64 | 64  | ≤0.125 | ≤0.25 | 2 | 0.5   | >128 | >64 | <0.125 | >64 | 2   | 64   | ≤0.03 |
| NT2A19  | Anal swab      | III  | 8  | >64 | >64 | 128 | ≤0.125 | 0.5   | 4 | 4     | >128 | >64 | <0.125 | >64 | 64  | 32   | ≤0.03 |
| NT1A19  | Anal swab      | III  | 64 | >64 | >64 | 64  | ≤0.125 | ≤0.25 | 4 | <0.03 | >128 | >64 | <0.125 | >64 | 64  | 64   | ≤0.03 |
| NT1A22  | Anal swab      | III  | 32 | >64 | >64 | 64  | ≤0.125 | ≤0.25 | 4 | 0.125 | >128 | >64 | <0.125 | >64 | 2   | 64   | ≤0.03 |
| NT1F19  | Faeces         | III  | 32 | >64 | >64 | 64  | ≤0.125 | ≤0.25 | 8 | 0.25  | >128 | >64 | <0.125 | >64 | 64  | 64   | ≤0.03 |
| NT1F16  | Faeces         | III  | 16 | >64 | >64 | 64  | ≤0.125 | ≤0.25 | 4 | 0.25  | >128 | >64 | <0.125 | >64 | 16  | 128  | ≤0.03 |
| NT1F13  | Faeces         | III  | 64 | >64 | >64 | 64  | ≤0.125 | ≤0.25 | 1 | <0.03 | >128 | >64 | 0.25   | >64 | 32  | 128  | ≤0.03 |
| NT1A34  | Anal swab      | III  | 16 | >64 | >64 | 64  | ≤0.125 | ≤0.25 | 4 | <0.03 | >128 | >64 | <0.125 | >64 | 4   | 64   | ≤0.03 |
| NT1F22  | Faeces         | III  | 32 | >64 | >64 | 64  | ≤0.125 | ≤0.25 | 2 | <0.03 | >128 | >64 | 0.5    | >64 | 64  | 128  | ≤0.03 |
| NT1F28  | Faeces         | III  | 32 | >64 | >64 | 128 | ≤0.125 | ≤0.25 | 2 | 0.125 | >128 | >64 | <0.125 | >64 | 8   | 64   | ≤0.03 |
| NT1A7   | Anal swab      | III  | 16 | >64 | >64 | 128 | ≤0.125 | 0.5   | 2 | 4     | >128 | >64 | 0.5    | >64 | 16  | 32   | ≤0.03 |
| NT1A1   | Anal swab      | III  | 32 | >64 | >64 | 64  | ≤0.125 | ≤0.25 | 1 | 0.125 | >128 | >64 | <0.125 | >64 | 2   | 64   | ≤0.03 |
| NT1A4   | Anal swab      | III  | 32 | >64 | >64 | 64  | ≤0.125 | ≤0.25 | 4 | 0.25  | >128 | >64 | <0.125 | >64 | 16  | 64   | ≤0.03 |
| NT1A28  | Anal swab      | III  | 16 | >64 | >64 | 32  | ≤0.125 | ≤0.25 | 2 | 0.25  | >128 | >64 | <0.125 | >64 | 16  | 128  | ≤0.03 |

<sup>a</sup>TIG, tigecycline; TET, tetracycline; FFC, florfenicol; DOX, doxycycline; ATM, aztreonam; CQM, cefquinome; KAN, kanamycin; ENR, enrofloxacin; AMX, amoxicillin; OXY, oxytetracycline; CL, colistin; TMP, trimethoprim; STR, streptomycin; MIN, minocycline; MEM, meropenem.

**Supplementary Table 4. Basic information of 32 *tet(X)* positive strains.**

| Sample IDs | Biosample    | Sequencing Technology                        | Assembly methods           | Completion                     | Num_seqs | Sum_len   | Isolation source | Collected date | Location       |
|------------|--------------|----------------------------------------------|----------------------------|--------------------------------|----------|-----------|------------------|----------------|----------------|
|            |              |                                              |                            | state of assembly <sup>a</sup> |          |           |                  |                |                |
| NT1A1      | SAMN16120625 | Illumina MiSeq                               | SPAdes                     | draft                          | 135      | 4,781,470 | anal swab        | 2018           | China: Nantong |
| NT1A13     | SAMN16120628 | Illumina MiSeq                               | SPAdes                     | draft                          | 127      | 4,735,833 | anal swab        | 2018           | China: Nantong |
| NT1A16     | SAMN16120629 | Illumina MiSeq                               | SPAdes                     | draft                          | 136      | 4,911,356 | anal swab        | 2018           | China: Nantong |
| NT1A19     | SAMN16120630 | Illumina MiSeq                               | SPAdes                     | draft                          | 125      | 4,854,895 | anal swab        | 2018           | China: Nantong |
| NT1A22     | SAMN16120631 | Illumina MiSeq                               | SPAdes                     | draft                          | 129      | 4,736,031 | anal swab        | 2018           | China: Nantong |
| NT1A25     | SAMN16120632 | Illumina MiSeq                               | SPAdes                     | draft                          | 113      | 4,741,934 | anal swab        | 2018           | China: Nantong |
| NT1A28     | SAMN16120633 | Illumina MiSeq                               | SPAdes                     | draft                          | 141      | 4,836,843 | anal swab        | 2018           | China: Nantong |
| NT1A31     | SAMN16120634 | Illumina MiSeq                               | SPAdes                     | draft                          | 129      | 4,856,968 | anal swab        | 2018           | China: Nantong |
| NT1A34     | SAMN16120635 | Illumina MiSeq                               | SPAdes                     | draft                          | 167      | 4,588,704 | anal swab        | 2018           | China: Nantong |
| NT1A4      | SAMN16120626 | Illumina MiSeq                               | SPAdes                     | draft                          | 133      | 4,734,966 | anal swab        | 2018           | China: Nantong |
| NT1A7      | SAMN16120627 | Illumina MiSeq                               | SPAdes                     | draft                          | 135      | 4,945,567 | anal swab        | 2018           | China: Nantong |
| NT1C1      | SAMN16120636 | Illumina MiSeq                               | SPAdes                     | draft                          | 131      | 4,765,887 | soil             | 2018           | China: Nantong |
| NT1C4      | SAMN16120637 | Illumina MiSeq                               | SPAdes                     | draft                          | 124      | 4,851,737 | soil             | 2018           | China: Nantong |
| NT1F10     | SAMN16120638 | Illumina MiSeq;<br>Oxford Nanopore<br>MinION | SPAdes; Flye;<br>Unicycler | complete                       | 4        | 5,001,593 | faeces           | 2018           | China: Nantong |
| NT1F13     | SAMN16120639 | Illumina MiSeq                               | SPAdes                     | draft                          | 125      | 4,853,670 | faeces           | 2018           | China: Nantong |
| NT1F16     | SAMN16120640 | Illumina MiSeq                               | SPAdes                     | draft                          | 161      | 4,577,240 | faeces           | 2018           | China: Nantong |
| NT1F19     | SAMN16120641 | Illumina MiSeq                               | SPAdes                     | draft                          | 158      | 4,576,330 | faeces           | 2018           | China: Nantong |
| NT1F22     | SAMN16120642 | Illumina MiSeq                               | SPAdes                     | draft                          | 127      | 4,683,777 | faeces           | 2018           | China: Nantong |
| NT1F25     | SAMN16120643 | Illumina MiSeq;<br>Oxford Nanopore<br>MinION | SPAdes; Flye;<br>Unicycler | incomplete                     | 2        | 4,739,619 | faeces           | 2018           | China: Nantong |
| NT1F28     | SAMN16120644 | Illumina MiSeq                               | SPAdes                     | draft                          | 136      | 4,736,267 | faeces           | 2018           | China: Nantong |
| NT1F31     | SAMN12996975 | Illumina MiSeq;<br>Oxford Nanopore<br>MinION | SPAdes; Flye;<br>Unicycler | complete                       | 4        | 5,034,814 | faeces           | 2018           | China: Nantong |
| NT1F34     | SAMN16120645 | Illumina MiSeq;<br>Oxford Nanopore<br>MinION | SPAdes; Flye;<br>Unicycler | incomplete                     | 3        | 4,896,982 | faeces           | 2018           | China: Nantong |
| NT1N25     | SAMN16120647 | Illumina MiSeq;<br>Oxford Nanopore<br>MinION | SPAdes; Flye;<br>Unicycler | complete                       | 3        | 4,871,057 | nose swab        | 2018           | China: Nantong |
| NT1N28     | SAMN16120648 | Illumina MiSeq;<br>Oxford Nanopore<br>MinION | SPAdes; Flye;<br>Unicycler | incomplete                     | 3        | 4,914,062 | nose swab        | 2018           | China: Nantong |
| NT1N31     | SAMN16120649 | Illumina MiSeq;<br>Oxford Nanopore<br>MinION | SPAdes; Flye;<br>Unicycler | complete                       | 3        | 4,779,075 | nose swab        | 2018           | China: Nantong |
| NT1N34     | SAMN16120650 | Illumina MiSeq;                              | SPAdes; Flye;              | complete                       | 3        | 4,777,969 | nose swab        | 2018           | China: Nantong |

|        |              |                                              |                            |          |     |           |           |      |                |
|--------|--------------|----------------------------------------------|----------------------------|----------|-----|-----------|-----------|------|----------------|
| NT1N4  | SAMN16120646 | Oxford Nanopore<br>MinION<br>Illumina MiSeq  | Unicycler<br>SPAdes        | draft    | 139 | 4,856,729 | nose swab | 2018 | China: Nantong |
| NT1W22 | SAMN16120651 | Illumina MiSeq;<br>Oxford Nanopore<br>MinION | SPAdes; Flye;<br>Unicycler | complete | 3   | 4,862,371 | water     | 2018 | China: Nantong |
| NT1W25 | SAMN16120652 | Illumina MiSeq;<br>Oxford Nanopore<br>MinION | SPAdes; Flye;<br>Unicycler | complete | 4   | 4,873,400 | water     | 2018 | China: Nantong |
| NT2A19 | SAMN16120654 | Illumina MiSeq                               | SPAdes                     | draft    | 130 | 4,851,443 | anal swab | 2018 | China: Nantong |
| NT2A7  | SAMN16120653 | Illumina MiSeq                               | SPAdes                     | draft    | 101 | 5,047,123 | anal swab | 2018 | China: Nantong |
| NT2W25 | SAMN16120655 | Illumina MiSeq                               | SPAdes                     | draft    | 133 | 4,703,970 | water     | 2018 | China: Nantong |

<sup>a</sup> The incomplete sequences are caused by multiple copies of *tet(X4)*.

**Supplementary Table 5. Chromosomally mediated CRISPRs spacers specific to plasmids and phages.**

| Spacer IDs | Matching products           | Accession no. | Product code <sup>a</sup>           |
|------------|-----------------------------|---------------|-------------------------------------|
| 3          | pLD91-1-76kb                | NZ_CP042584.1 | DUF1380 family protein              |
| 2          | phage Ss-VASD               | KR781488      | no                                  |
| 12         | cp32-quad                   | NC_015906.1   | no                                  |
| 17         | phage P1                    | MH422554      | hp                                  |
| 21         | pLD91-1-76kb                | NZ_CP042584.1 | hp                                  |
| 38         | pIOMTU792                   | NZ_LC542972.1 | no                                  |
| 39         | phage 118970_sal3           | KU927493      | putative DNA methyltransferase      |
| 42         | pLec-476cz                  | NZ_KY320277.1 | DNA (cytosine-5-)-methyltransferase |
| 45         | 2012C-4221 plasmid unnamed1 | NZ_CP027438.1 | hp                                  |
| 48         | pN069_3                     | NZ_AP019820.1 | hp                                  |
| 50         | phage Edno5                 | MH898687      | hp                                  |
| 55         | phage ST974-OXA48phi18.2    | MK448237      | terminase small subunit             |
| 66         | phage LV-2017               | KY271401      | portal protein                      |
| 92         | phage S-CAM3                | KU686199      | hp                                  |

<sup>a</sup>no, not detected; hp, hypothetical protein.

**Supplementary Table 6. Basic information of ten *tet(X4)*-positive plasmids sequenced in this study.**

| <b>Plasmid</b> | <b>Isolation source</b> | <b>Plasmid size</b> | <b>Sequencing Technology</b>        | <b>Replicons</b>    | <b>Resistance genes</b>                                                                                                                                        |
|----------------|-------------------------|---------------------|-------------------------------------|---------------------|----------------------------------------------------------------------------------------------------------------------------------------------------------------|
| pNT1F10-tetX4  | faeces                  | 97,500 bp           | Oxford Nanopore<br>MinION, Illumina | IncFIA,IncFIB,IncX1 | <i>bla</i> <sub>TEM-1B</sub> , <i>dfrA5</i> , <i>floR</i> ,<br><i>mef(B)</i> , <i>qnrS1</i> , <i>sul3</i> ,<br><i>tet(A)</i> , <i>tet(M)</i> , <i>tet(X4)</i>  |
| pNT1F25-tetX4  | faeces                  | 122,563 bp          | Oxford Nanopore<br>MinION, Illumina | IncFIA,IncFIB,IncX1 | <i>bla</i> <sub>TEM-1B</sub> , <i>dfrA5</i> , <i>floR</i> ,<br><i>mef(B)</i> , <i>qnrS1</i> , <i>sul3</i> ,<br><i>tet(A)</i> , <i>tet(M)</i> , <i>tet(X4)</i>  |
| pNT1F31-tetX4  | faeces                  | 115,253 bp          | Oxford Nanopore<br>MinION, Illumina | IncFIA,IncFIB,IncX1 | <i>bla</i> <sub>TEM-1B</sub> , <i>dfrA5</i> , <i>floR</i> ,<br><i>mef(B)</i> , <i>qnrS1</i> , <i>sul3</i> ,<br><i>tet(A)</i> , <i>tet(M)</i> , <i>tet(X4)</i>  |
| pNT1F34-tetX4  | faeces                  | 128,941 bp          | Oxford Nanopore<br>MinION, Illumina | IncFIA,IncFIB,IncX1 | <i>bla</i> <sub>TEM-1B</sub> , <i>dfrA5</i> , <i>floR</i> ,<br><i>mef(B)</i> , <i>qnrS1</i> , <i>sul3</i> ,<br><i>tet(A)</i> , <i>tet(M)</i> , <i>tet(X4)</i>  |
| pNT1N25-tetX4  | nose swab               | 147,983 bp          | Oxford Nanopore<br>MinION, Illumina | IncFIA,IncFIB,IncX1 | <i>bla</i> <sub>TEM-1B</sub> , <i>dfrA5</i> , <i>floR</i> ,<br><i>mef(B)</i> , <i>qnrS1</i> , <i>sul3</i> ,<br><i>tet(A)</i> , <i>tet(M)</i> , <i>tet(X4)</i>  |
| pNT1N28-tetX4  | nose swab               | 148,421 bp          | Oxford Nanopore<br>MinION, Illumina | IncFIA,IncFIB,IncX1 | <i>bla</i> <sub>TEM-1B</sub> , <i>dfrA5</i> , <i>floR</i> ,<br><i>mef(B)</i> , <i>qnrS1</i> , <i>sul3</i> ,<br><i>tet(A)</i> , <i>tet(M)</i> , <i>tet(X4)</i>  |
| pNT1N31-tetX4  | nose swab               | 103,246 bp          | Oxford Nanopore<br>MinION, Illumina | IncFIA,IncFIB,IncX1 | <i>bla</i> <sub>TEM-1B</sub> , <i>dfrA5</i> , <i>floR</i> ,<br><i>mef(B)</i> , <i>qnrS1</i> , <i>sul3</i> ,<br><i>tet(A)</i> , <i>tet(M)</i> , <i>tet(X4)</i>  |
| pNT1N34-tetX4  | nose swab               | 103,081 bp          | Oxford Nanopore<br>MinION, Illumina | IncFIA,IncFIB,IncX1 | <i>bla</i> <sub>TEM-1B</sub> , <i>dfrA5</i> , <i>floR</i> ,<br><i>mef(B)</i> , <i>qnrS1</i> , <i>sul3</i> ,<br><i>tet(A)</i> , <i>tet(M)</i> , <i>tet(X4)</i>  |
| pNT1W22-tetX4  | water                   | 101,476 bp          | Oxford Nanopore<br>MinION, Illumina | IncFIA,IncFIB,IncX1 | <i>bla</i> <sub>TEM-1B</sub> , <i>dfrA5</i> , <i>floR</i> ,<br><i>mef(B)</i> , <i>qnrS1</i> , <i>sul3</i> ,<br><i>tet(A)</i> , <i>tet(M)</i> , <i>tet(X4)</i>  |
| pNT1W25-tetX4  | water                   | 102,128 bp          | Oxford Nanopore<br>MinION, Illumina | IncFIA,IncFIB,IncX1 | <i>bla</i> <sub>TEM-150</sub> , <i>dfrA5</i> , <i>floR</i> ,<br><i>mef(B)</i> , <i>qnrS1</i> , <i>sul3</i> ,<br><i>tet(A)</i> , <i>tet(M)</i> , <i>tet(X4)</i> |



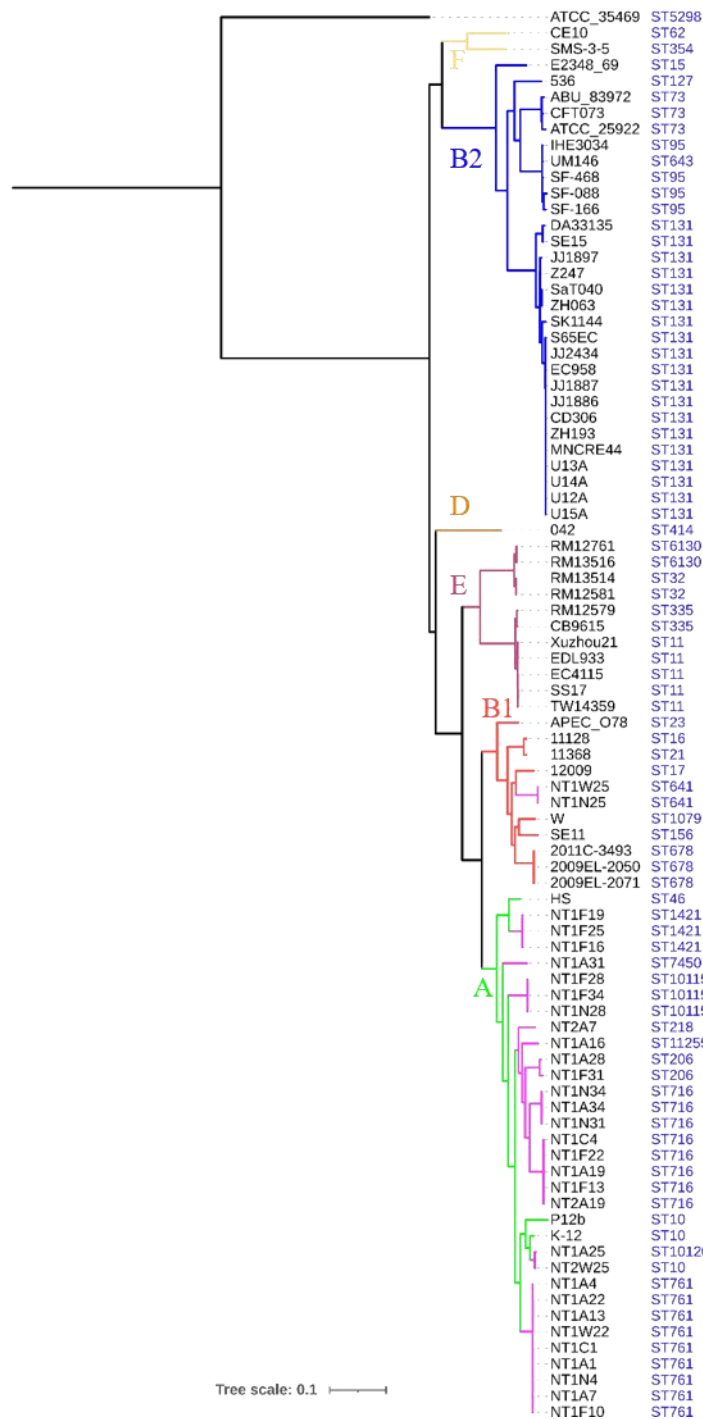

**Figure S1. Core-genome phylogeny of 88 *Escherichia coli* strains.** Maximum likelihood analysis built from 140,071 core-genome single-nucleotide polymorphisms (SNPs) relative to the reference chromosome NT1F31 (GenBank: CP045190). SNPs were identified with Parsnp v1.2 and represent a 1,622,661 bp core-genome. Phylogeny is rooted according to the actual root by *Escherichia fergusonii* ATCC 35469 (GenBank: CU928158). Branch colours indicate the six main phylogenetic groups where the strains highlighted in magenta are from this study. Branch lengths and scale bar represent number of nucleotide substitutions per site.

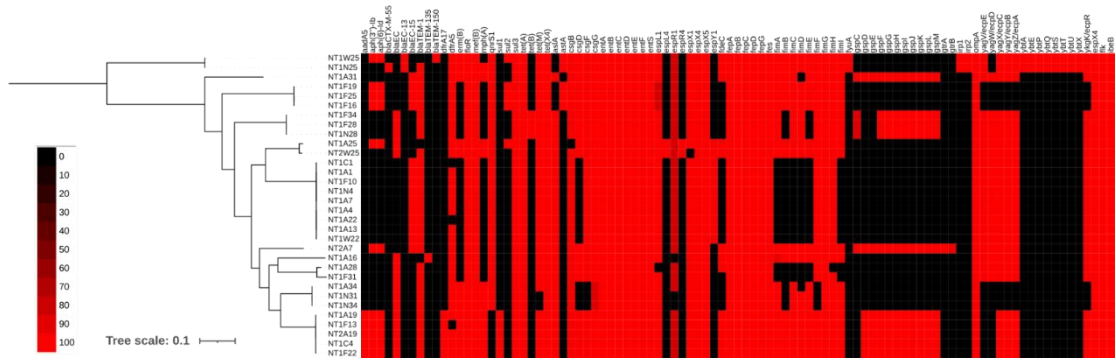

**Figure S2. Phylogenetic tree of 32 *tet(X4)*-positive *E. coli* strains.** The right part represents the heatmap of all antimicrobial resistance genes and virulence factors in *tet(X4)*-positive isolates collected from the pig farm.

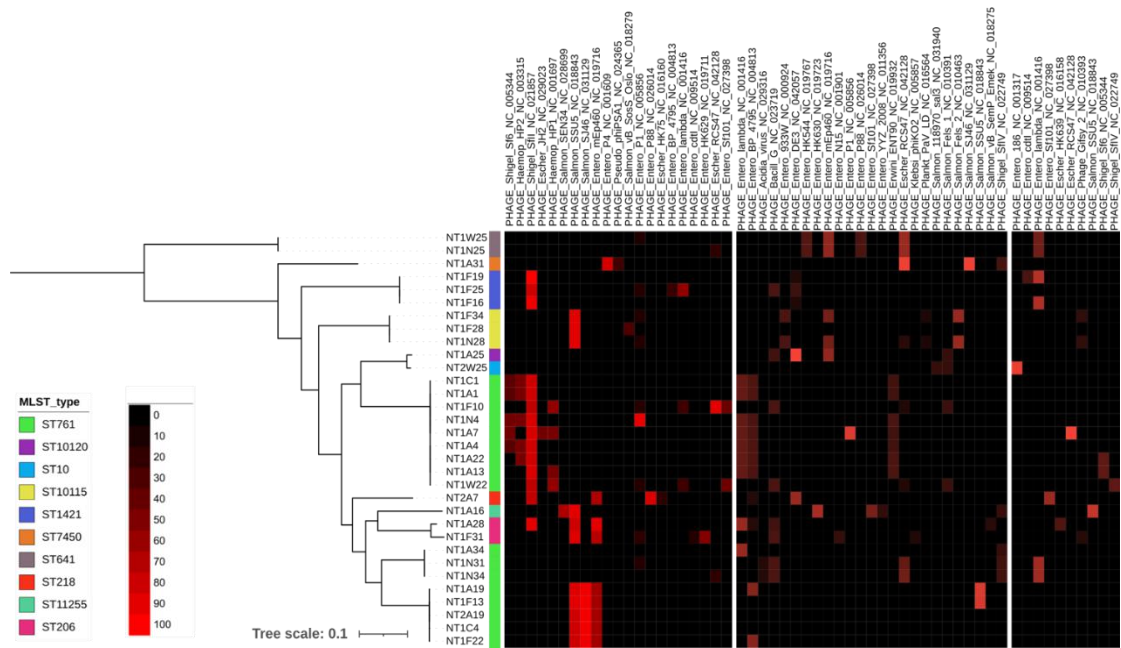

**Figure S3. Prophage distribution among 32 *tet(X4)*-positive *E. coli*.** The redder the color, the higher the similarity.

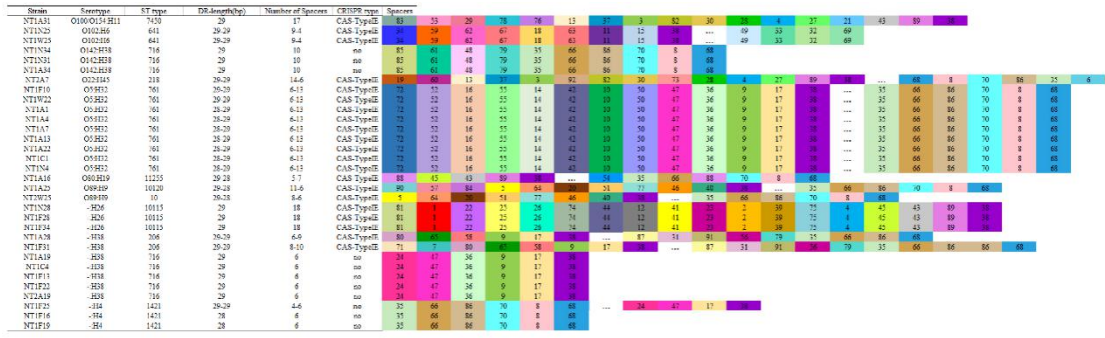

**Figure S4. CRISPR allele configuration of 32 *E. coli* strains.** The number in the rectangle represents the serial number of the spacer. Replace discrete spacers with "...", and repeat spacers with the same color.

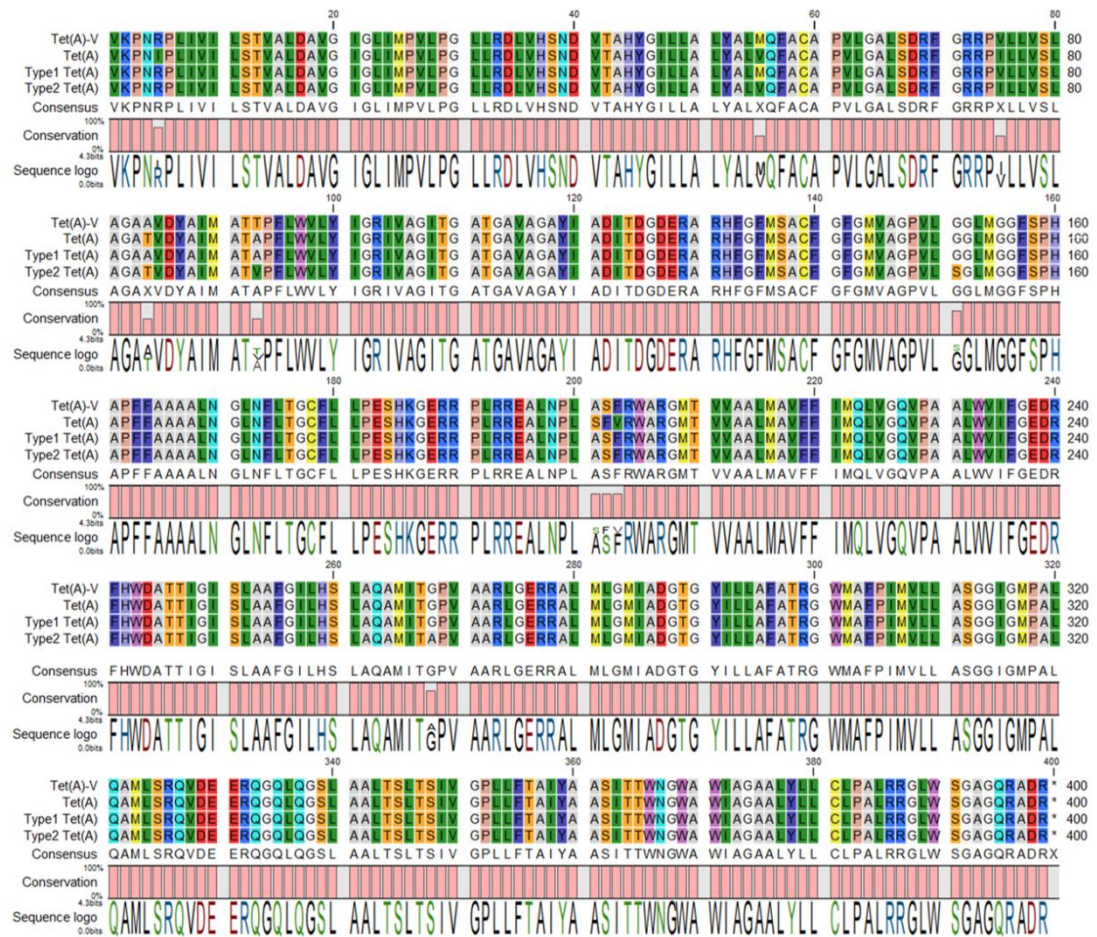

**Figure S5. Amino acid sequence alignment of different *tet(A)* variants.** Colors in the figure represent different amino acids. Amino acid sequence changed in Tet(A)-V compared with Tet(A) with the following sites: Thr5Arg, Val55Met, Ile75Val, Thr84Ala, Ala93Thr, Ser201Ala, Phe202Ser and Val203Phe.

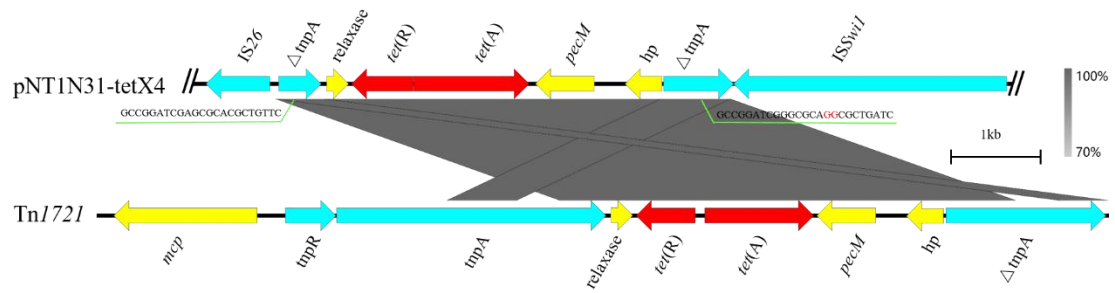

**Figure S6. Linear comparison of *tet(A)-v* genetic environment and Tn1721.** The red arrows and the blue arrows represent the resistance genes and mobile elements, respectively. The gray regions indicate the homologous region between plasmid regions.

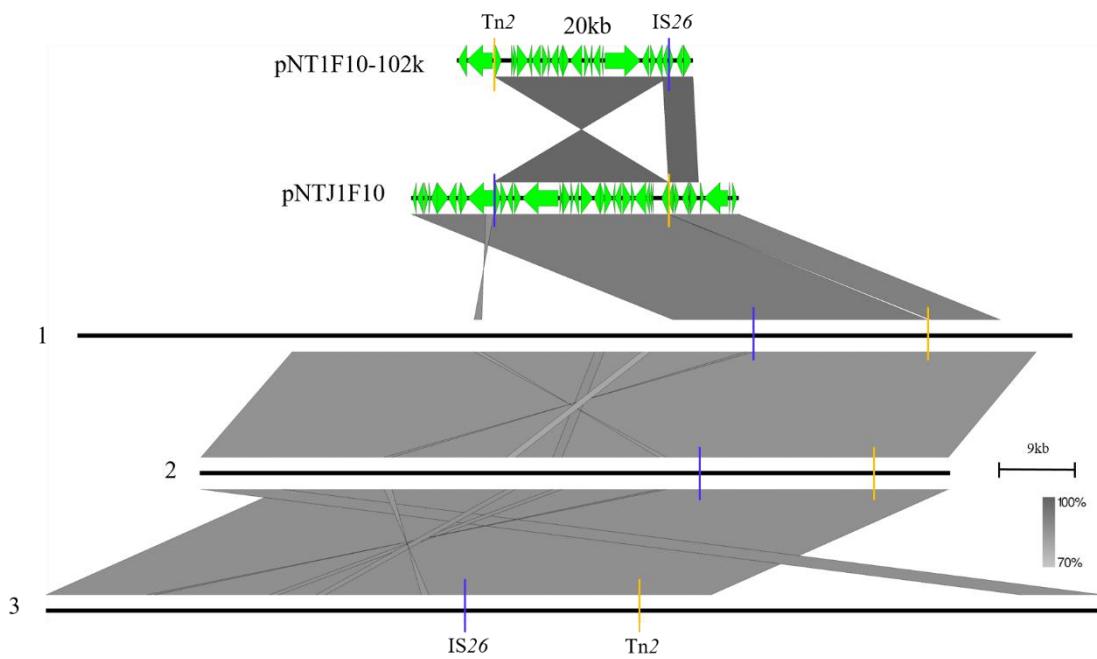

**Figure S7. Linear comparison of 20kb region in pNT1F10-102k, pNTJ1F10 and Nanopore sequencing long reads.** The gray regions indicate the homologous region between plasmid regions.

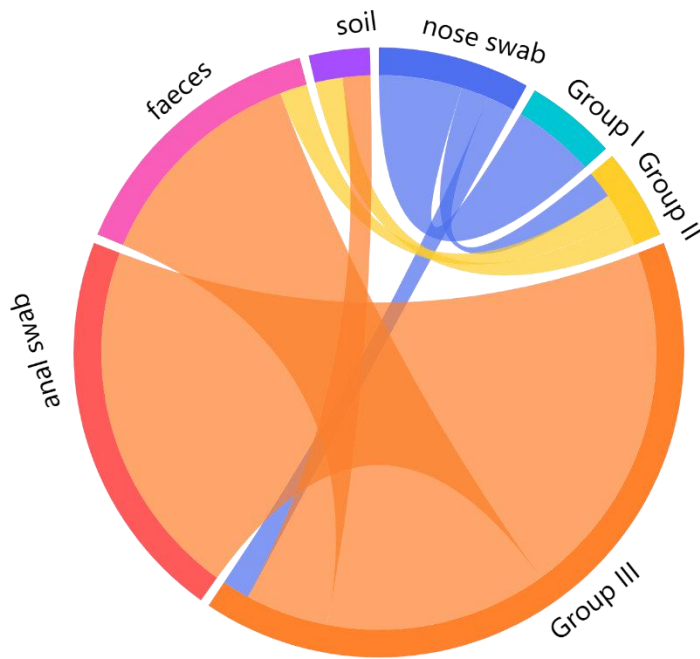

**Figure S8. Chord diagram combining the *tet(X4)*-positive strain source and *tet(X4)* genetic environments.** A total of 3 groups *tet(X4)* genetic environments and 3 groups strain source.

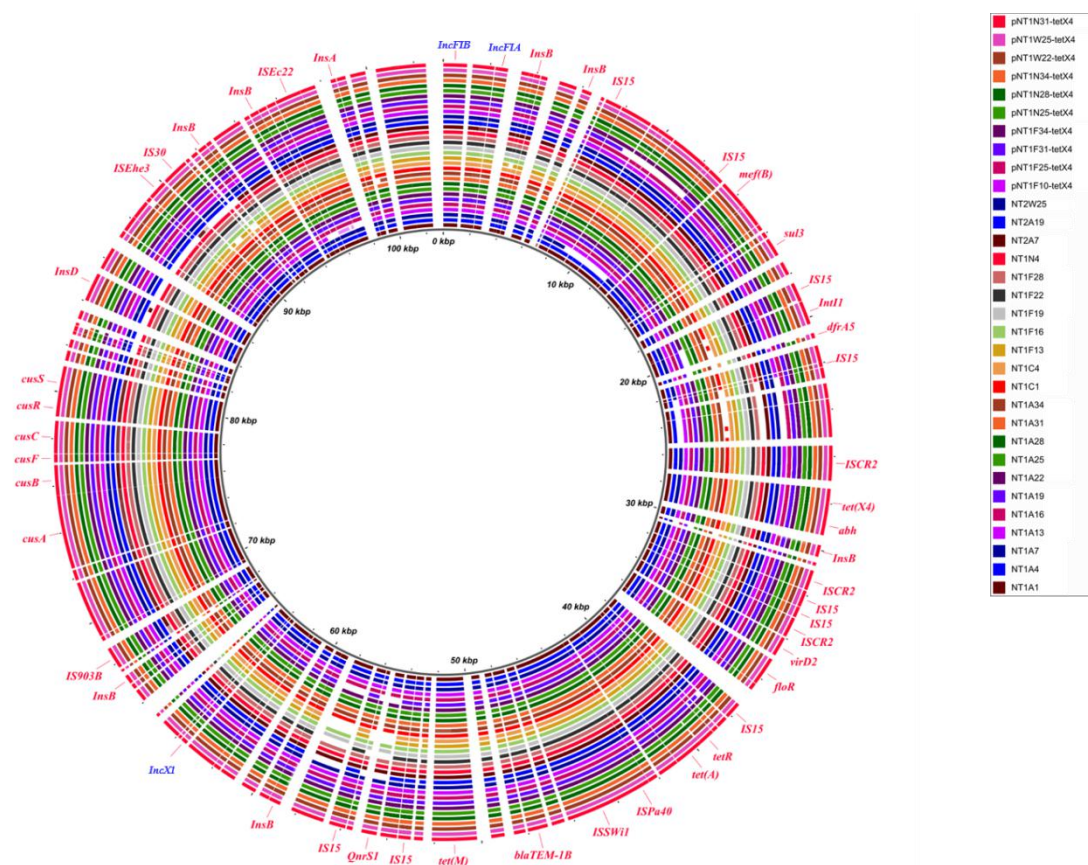

**Figure S9. Circular comparison of *tet(X4)*-bearing plasmids.** All the plasmids carried *tet(X4)* gene contain the IncX1, IncFIA and IncFIB plasmid replicon. Blank region represented the non-coding sequences.

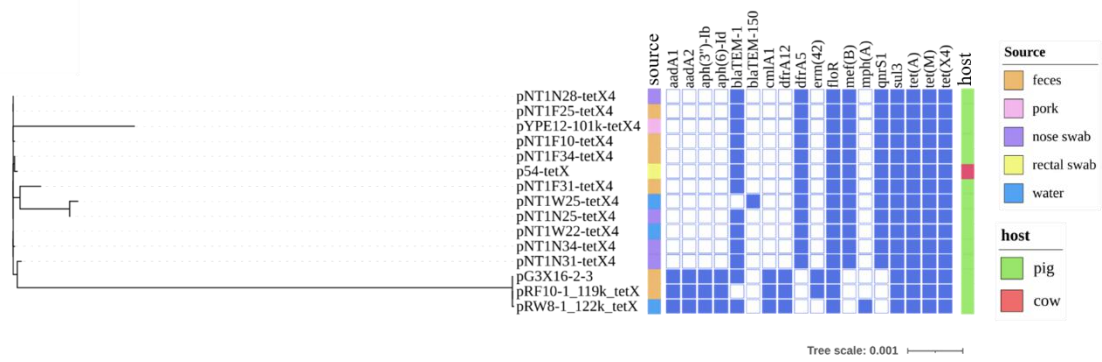

**Figure S10. Phylogenetic tree of 10 *tet(X4)*-positive plasmids in this study and other same Inc type plasmids in NCBI. The genes *floR*, *sul3*, *tet(A)* and *tet(M)* were found in all *tet(X4)*-positive plasmids.**
